# Supplementary material for: Production of novel microporous porphyrin materials with superior sensing capabilities
Source: Royal Society of Chemistry journal article supplement (doi:10.1039/c2jm15008e), 2012-01-01

## Supporting Information for

### **Production of novel microporous porphyrin materials with superior sensing capabilities**

**Michele Tonezzer<sup>a,b\*</sup>, Gianluigi Maggioni<sup>b,c</sup>, Enrico Dalcanale<sup>d</sup>**

a University of Trento, Department of Materials Engineering and Industrial Technologies, Via Mesiano 77, 38050 Povo (TN), Italy,

b INFN-Legnaro National Laboratories, Viale dell'Università 2, 35020, Legnaro (PD), Italy,

c University of Padova, Department of Physics, at INFN-Legnaro National Laboratories, Viale dell'Università 2, 35020, Legnaro (PD), Italy,

d Dipartimento di Chimica Organica ed Industriale and INSTM, UdR Parma, Parco Area delle Scienze 17/A, 43124 Parma, Italy,

**Figure S1:** ESI-MS spectra of : A) CoTPP after deposition by GDS technique; B) pristine CoTPP powder.

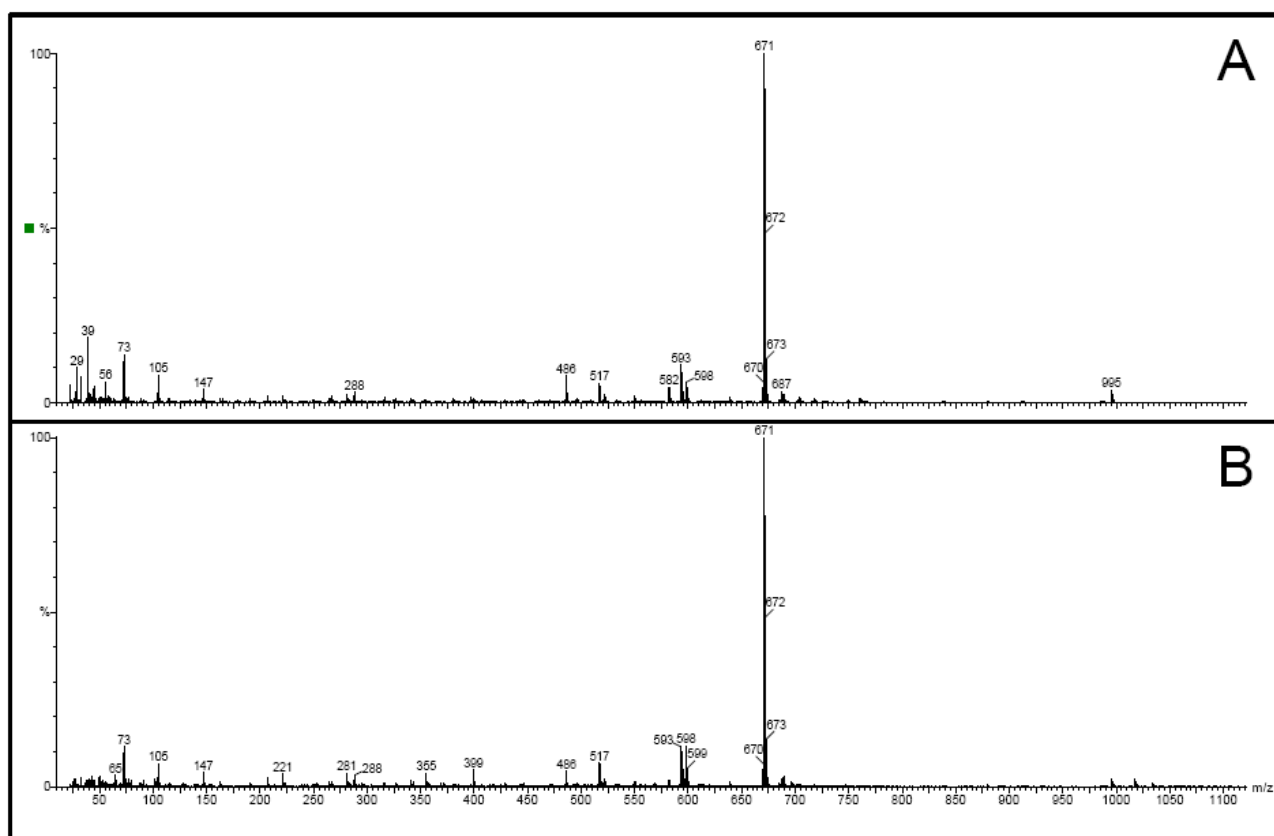

**Figure S2:** Structure of metal free 5,10,15,20 meso-tetraphenyl porphyrin ( $H_2TPP$ ).

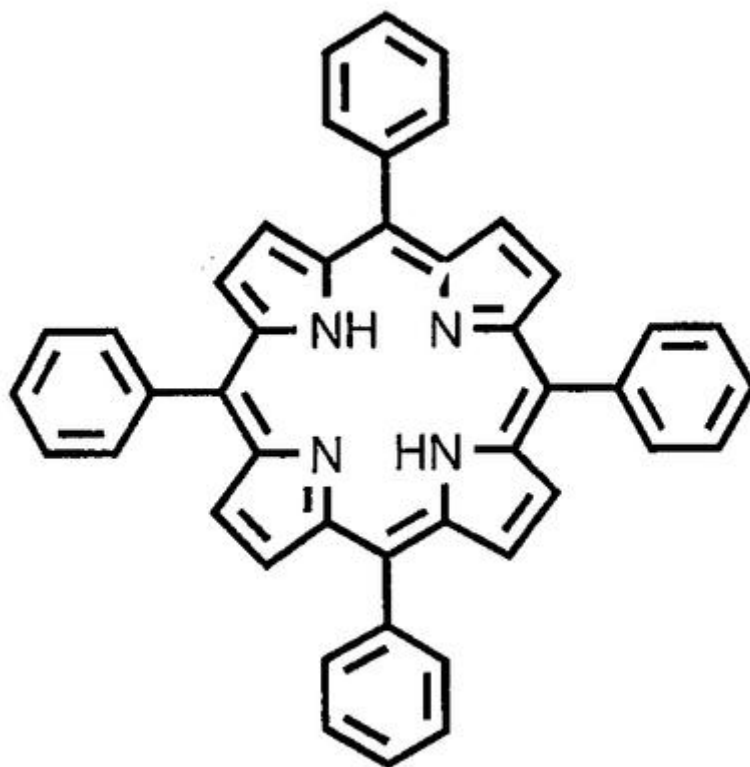

Supplement: c2jm15008e.pdf [file c2jm15008e.pdf]
